# Supplementary material for: Thermotolerant and Li2Sn-trapped/converted separators enabled by NiFe2O4 quantum dots/g-C3N4 nanofiber interlayers: toward more practical Li–S batteries
Source: Royal Society of Chemistry journal article supplement (doi:10.1039/d2qm00351a), 2022-01-01
Supplement: d2qm00351a1.pdf [file d2qm00351a1.pdf]

## ***Electronic Supplementary Information***

# **Thermotolerant and $\text{Li}_2\text{S}_n$ -Trapped/Converted Separators Enabled by $\text{NiFe}_2\text{O}_4$ Quantum Dots/ $\text{g-C}_3\text{N}_4$ Nanofiber Interlayers: Toward More Practical Li-S Batteries**

Jieyu Peng<sup>a</sup>, Jianhui Zhu<sup>b\*</sup>, Yanlong Wang<sup>c</sup>, Maowen Xu<sup>a</sup>, Jian Jiang<sup>a,d\*</sup>

<sup>a</sup>*School of Materials and Energy, and Chongqing Key Lab for Advanced Materials and Clean Energies of Technologies, Southwest University, No. 2 Tiansheng Road, BeiBei District, Chongqing 400715, P.R. China.*

<sup>b</sup>*School of Physical Science and Technology, and Chongqing key Laboratory of Micro & Nano Structure Optoelectronics, Southwest University, No.2 Tiansheng Road, BeiBei District, Chongqing 400715, P.R. China.*

<sup>c</sup>*Key Laboratory of Chemical Lasers, Dalian Institute of Chemical Physics, Chinese Academy of Sciences, Dalian 116023, P. R. China.*

<sup>d</sup>*College of Chemistry and Chemical Engineering, Key Laboratory of Laser Technology and Optoelectronic Functional Materials of Hainan Province, and Key Laboratory of Functional Materials and Photoelectrochemistry of Haikou, Hainan Normal University, Haikou 571158, China.*

*To whom correspondence should be addressed: Tel: +86-23-68254842.*

*\*E-mail: jhzhu@swu.edu.cn (J. Zhu); jjiang@swu.edu.cn (J. Jiang).*

## **1. Experimental Section**

### **1.1 Synthesis of $\text{g-C}_3\text{N}_4$ nanofibers and $\text{NiFe}_2\text{O}_4$ QDs**

For typical synthesis of  $\text{g-C}_3\text{N}_4$  nanofibers, 2.5 g melamine (Sigma-Aldrich) is dissolved into a 160 mL mixed solution made of ethylene glycol and water in a volume ratio of 2:1 at 60 °C. Afterwards, 60 mL 0.3 M  $\text{HNO}_3$  is dropwise added. The obtained mixture is then aged for 20 min, placed into a

refrigerator at  $-15\text{ }^{\circ}\text{C}$  and kept still for 1h. Later, the white precipitates are filtered, washed by deionized water several times, and dried in  $60\text{ }^{\circ}\text{C}$  electrical oven overnight. Finally, the powder samples are then collected, put into a  $\text{N}_2$  filled tube furnace and calcined at  $500\text{ }^{\circ}\text{C}$  (heating rate:  $5\text{ }^{\circ}\text{C}/\text{min}$ ) for 2 h. After cooled down naturally,  $g\text{-C}_3\text{N}_4$  samples with a light-yellow color are fetched for later use.

As for  $\text{NiFe}_2\text{O}_4$  QDs preparation, 4.04 g  $\text{Fe}(\text{NO}_3)_3\cdot 9\text{H}_2\text{O}$  (purity>99.99%, Sigma-Aldrich) and 1.45 g  $\text{Ni}(\text{NO}_3)_2\cdot 6\text{H}_2\text{O}$  (purity>99.99%, Alfa) are dissolved within 80 mL deionized water to form a homogeneous solution. Next, the concentrated ammonia (Sigma-Aldrich) is slowly added until the solution pH value reaches 8. The obtained transparent solution is subsequently transferred into a Teflon liner, which is sealed into a stainless steel autoclave, heated to  $190\text{ }^{\circ}\text{C}$  in an electrical oven and kept for 10h. After cooled down to room temperature naturally, brown  $\text{NiFe}_2\text{O}_4$  QDs powders are collected by centrifugation, washed with deionized water several times and dried at  $60\text{ }^{\circ}\text{C}$  overnight.

## 1.2 Preparation of $\text{NiFe}_2\text{O}_4$ QDs@ $g\text{-C}_3\text{N}_4$ Nanofibers Modified Separators

Typically, 10 mg  $g\text{-C}_3\text{N}_4$  nanofibers and 10 mg  $\text{NiFe}_2\text{O}_4$  QDs are added into a 20 mL mixed solution containing water and ethanol (volume ratio=1:1). Such a mixture is then ultrasonically treated for 30 min, and dried at  $60\text{ }^{\circ}\text{C}$  to obtain  $\text{NiFe}_2\text{O}_4$  QDs@ $g\text{-C}_3\text{N}_4$  hybrid products. Next, these powder samples, carbon black (CB; Ketjenblack EC-300J) and polyvinylidene fluoride (PVDF, Sigma-Aldrich) are mixed in a weight ratio of 6:3:1 and ground in moderate N-methylpyrrolidinone (NMP; Fluka) solvent to form a uniform slurry. This mud-like slurry is then pasted onto polypropylene (PP; Celgard 2500) separators by a paint scraper and dried at  $60\text{ }^{\circ}\text{C}$  in vacuum for 12 h. For comparison study, the  $g\text{-C}_3\text{N}_4$  slurry is also prepared and coated onto PP separators by according to the same procedures

aforementioned.

### 1.3 Materials Characterization and Electrochemical Testing

The crystalline structure/elemental information of samples are detected by X-ray diffraction (XRD, Bruker D8 Advance diffractometer with Cu K $\alpha$  radiation,  $\lambda=1.5418$  Å) and energy dispersive X-ray spectroscopy (EDS). Also, the X-ray photoelectron spectroscopy (XPS, PerkinElmer model PHI 5600 spectrometer) is used to probe more elemental information on samples surface. The basic geometric morphology and crystal structures of samples are characterized using a field-emission scanning electron microscope (FESEM, JEOL JSM-7800F) and transmission electron microscope (TEM, JEM 2010F). The N<sub>2</sub> adsorption/desorption data are recorded at a temperature of 77 K using a Autosorb-IQ2-MP-C system. Prior to this testing, the powder samples are degassed at 120 °C under vacuum for 12h. The specific surface area is calculated according to the Brunauer-Emmett-Teller (BET) equation, and the pore volumes are calculated from the adsorbed N<sub>2</sub> amount at a relative pressure ( $P/P_0$ ) of 0.99. The pore-size distributions are measured by referring to a nonlocal density functional theory (NL-DFT) model. The Kruss contact angle tester (DSA10-Mk2, Germany) is further used to measure the contact angles between the electrolyte and different separators.

The S/CB composites (S: CB=9:1) are used as working actives in cathodes. The electrode powders are then mixed with CB and PVDF binder under a weight ratio of 8:1:1 in NMP to form a uniform slurry. This slurry is then pasted onto an Al foil evenly and dried at 60 °C in vacuum overnight. The gained cathodes in an S loading range of 2.5-2.8 mg/cm<sup>2</sup> are then cut into discs. Besides, cathodes with a higher S areal density of 6.24 mg/cm<sup>2</sup> are also made for testing. 2032-type coin cells are assembled with S/CB cathodes, NiFe<sub>2</sub>O<sub>4</sub> QDs@g-C<sub>3</sub>N<sub>4</sub> modified separators and Li foil anodes in an Ar-

filled glovebox (Mikrouna;  $\text{H}_2\text{O}<0.1$  ppm,  $\text{O}_2<0.1$  ppm). The electrolyte is prepared by dissolving 1M bis(tri-fluoromethane) sulfonamide lithium salt (LiTFSI) into a DOL/DME (vol%=1:1) mixed solvent containing 1 wt%  $\text{LiNO}_3$ . The electrolyte/S (E/S) ratio is controlled to be a level of  $\sim 4.26$   $\mu\text{L}/\text{mg}$ . For battery testing, the cyclic voltammetry (CV) measurements (voltage range: 1.7-2.8 V vs. Li/Li<sup>+</sup>) and electrochemical impedance spectroscopy (frequency range: 100 kHz-0.1Hz) are performed on a CS310 electrochemical workstation. The galvanostatic charge-discharge tests are conducted by NEWARE battery testers in a voltage window of 1.7-2.8 V (vs. Li/Li<sup>+</sup>) at 25 °C.

As for  $\text{Li}_2\text{S}_6$  adsorption testing, 2 mM  $\text{Li}_2\text{S}_6$  solution is made by a synproportionation reaction of  $\text{Li}_2\text{S}$  and S (molar ratio=1:5) in DOL/DME solvents. This testing is then carried out by soaking 20 mg *g*- $\text{C}_3\text{N}_4$  or  $\text{NiFe}_2\text{O}_4$  QDs@*g*- $\text{C}_3\text{N}_4$  powders into  $\text{Li}_2\text{S}_6$  solution. The LiPS adsorption capability for different powders is evaluated by UV-Vis spectroscopy (UV-1800, Shimadzu, Japan). To visualize the LiPS adsorption effects for distinct interlayers, U-shaped glass bottles are utilized. Additionally, LiPSs symmetric cells are used to examine the catalytic reaction kinetics of samples. Two identical electrode disks (diameter: 12 mm; made of *g*- $\text{C}_3\text{N}_4$  or  $\text{NiFe}_2\text{O}_4$  QDs@*g*- $\text{C}_3\text{N}_4$ ) are assembled into a CR2032 coin-type cell with a PP separator and 30  $\mu\text{L}$  2 M  $\text{Li}_2\text{S}_6$  electrolyte. To study the variations at the separator-anode interfaces, Li/Li symmetric cells are also assembled using PP or  $\text{NiFe}_2\text{O}_4$  QDs@*g*- $\text{C}_3\text{N}_4$ /PP separators, respectively.

#### 1.4 Theoretical simulation and Calculations

The  $\text{Li}_2\text{S}_6$  adsorption simulation and density functional theory (DFT) calculations based on the Vienna ab initio simulation package (VASP) are performed through the *MatCloud+* platform. The core–valence interaction is represented using the projector-augmented wave (PAW) method. The plane wave energy cutoff is set to 450 eV. We also use the generalized gradient approximation with

the Perdew–Burke–Ernzerhof exchange-correlation functional and local Hubbard term U correction. The Brillouin zone is sampled at the  $\gamma$ -point with  $3 \times 1 \times 1$   $k$ -point meshes for g-C<sub>3</sub>N<sub>4</sub> model. The energy and force criteria for the convergence of electron density are successively set to  $10^{-5}$  eV and  $0.05$  eV  $\text{\AA}^{-1}$ . The  $2 \times 2$  supercell of g-C<sub>3</sub>N<sub>4</sub> is used for the Li<sub>2</sub>S<sub>6</sub> molecule adsorption. A vacuum gap of  $12$   $\text{\AA}$  is then set to restrict the interactions between periodic slabs.

## 2. Characterizations and additional testing results:

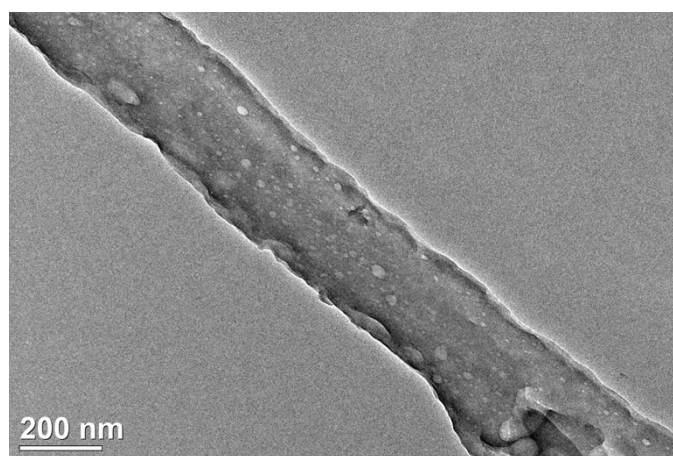

**Fig. S1** The typical TEM observation on our synthesized g-C<sub>3</sub>N<sub>4</sub> nanofibers.

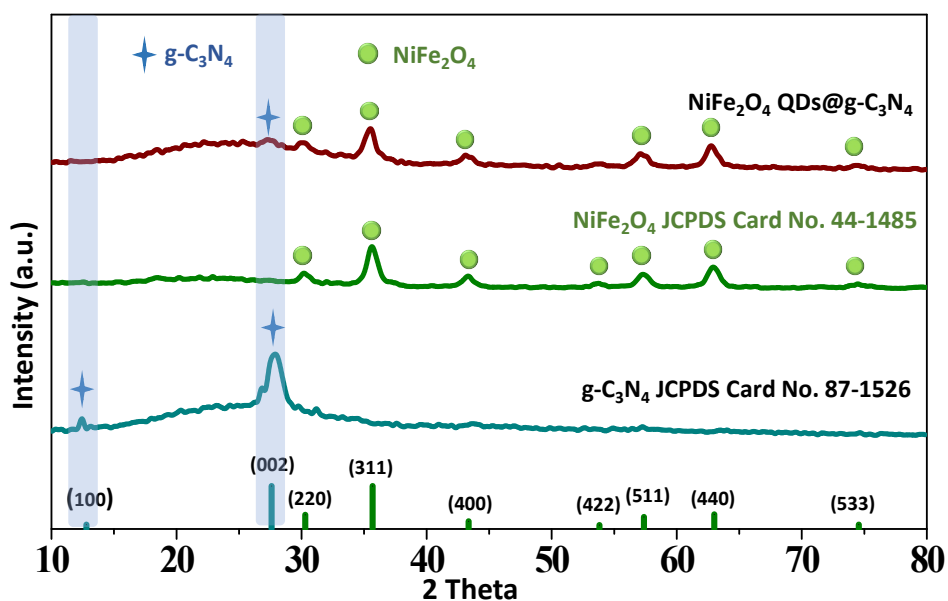

**Fig. S2** XRD patterns of g-C<sub>3</sub>N<sub>4</sub> nanofibers, NiFe<sub>2</sub>O<sub>4</sub> QDs and NiFe<sub>2</sub>O<sub>4</sub> QDs@g-C<sub>3</sub>N<sub>4</sub> nanofibers.

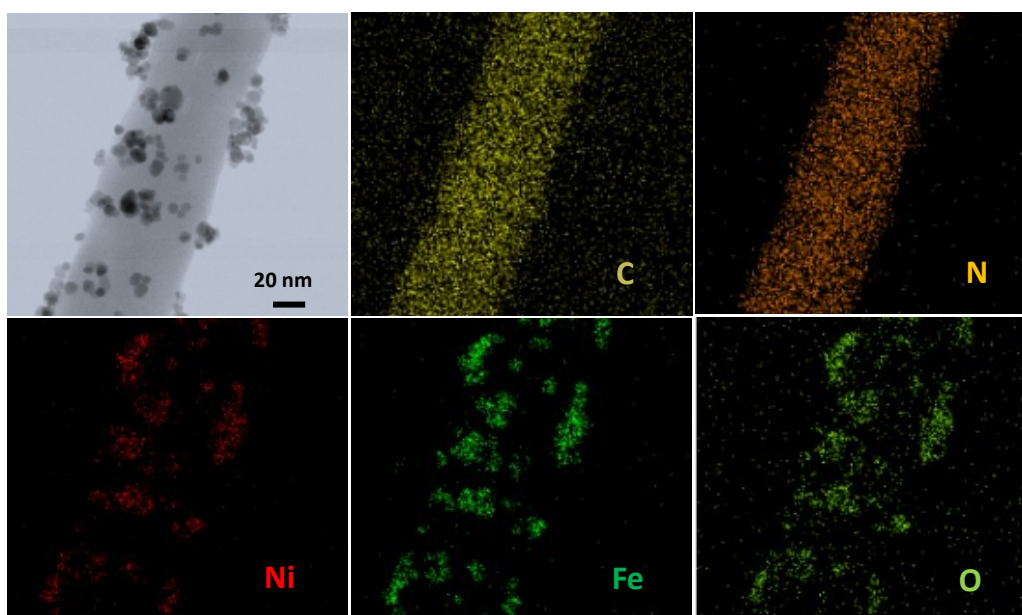

**Fig. S3** The EDS elemental mapping result of NiFe<sub>2</sub>O<sub>4</sub> QDs@g-C<sub>3</sub>N<sub>4</sub> nanofibers.

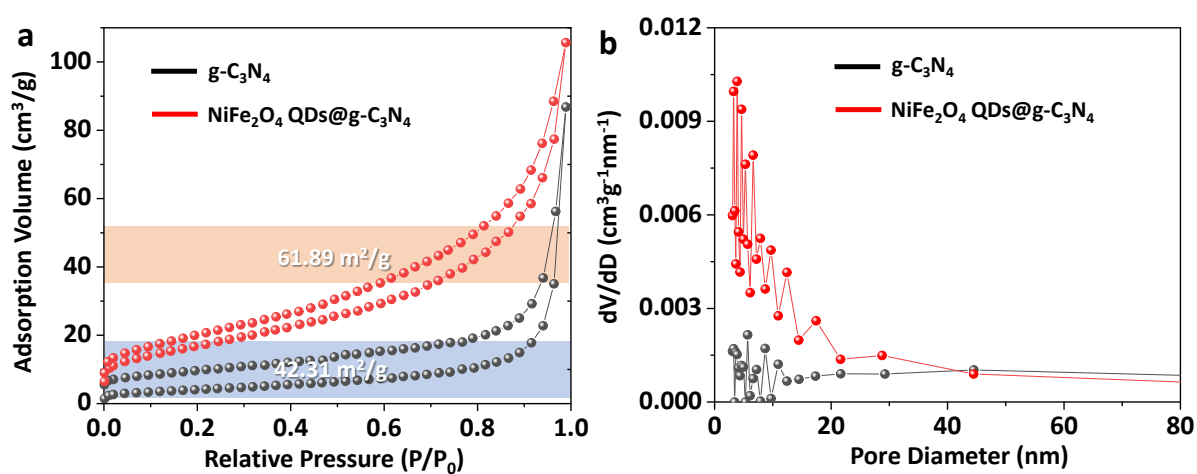

**Fig. S4** (a) N<sub>2</sub> adsorption/desorption isotherm and (b) pore-size distribution plots of g-C<sub>3</sub>N<sub>4</sub> and NiFe<sub>2</sub>O<sub>4</sub> QDs@g-C<sub>3</sub>N<sub>4</sub> nanofibers.

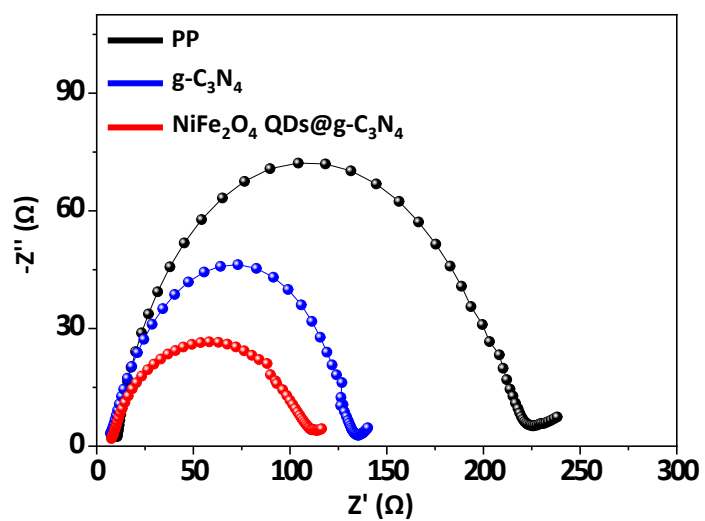

Fig. S5 Nyquist plots of LSBs configured by distinct separators.

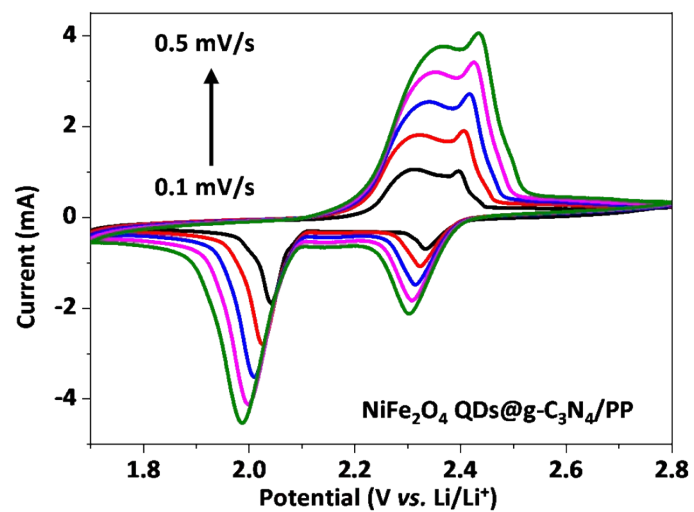

Fig. S6 CV curves of LSBs packed by NiFe<sub>2</sub>O<sub>4</sub> QDs@g-C<sub>3</sub>N<sub>4</sub>/PP under varied scan rates.

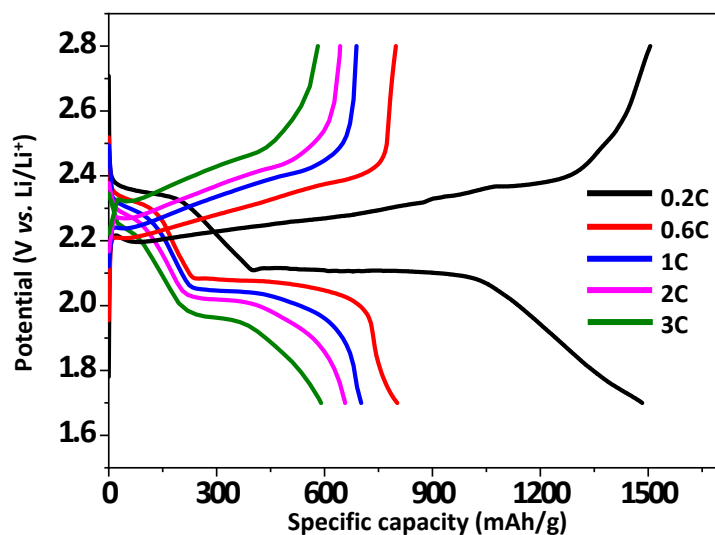

**Fig. S7** Charge/discharge voltage profiles of LSBs made by  $\text{NiFe}_2\text{O}_4$  QDs@g- $\text{C}_3\text{N}_4$ /PP separators.

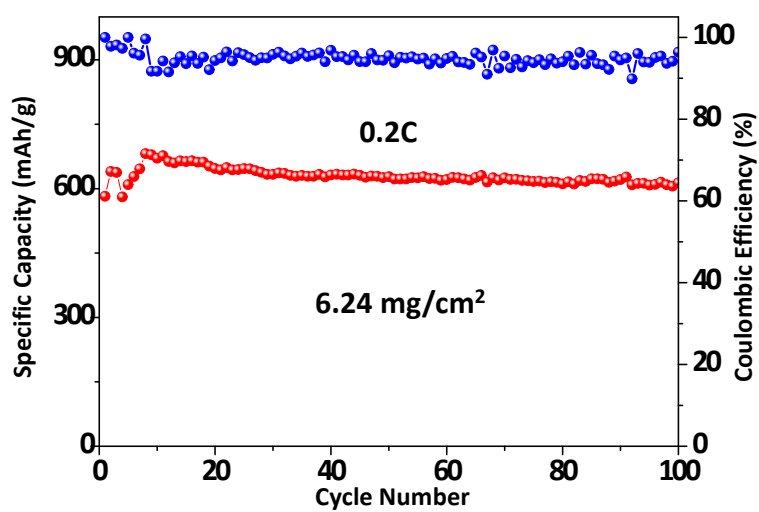

**Fig. S8** Cyclic performance of LSBs assembled with  $\text{NiFe}_2\text{O}_4$  QDs@g- $\text{C}_3\text{N}_4$ /PP separators under a high S loading ratio of  $6.24 \text{ mg/cm}^2$ .

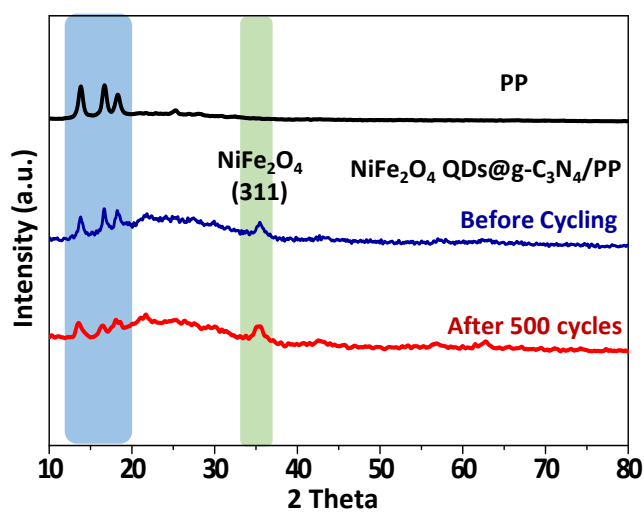

**Fig. S9** XRD patterns of PP and NiFe<sub>2</sub>O<sub>4</sub> QDs@g-C<sub>3</sub>N<sub>4</sub>/PP separators before and after 500 cycles.

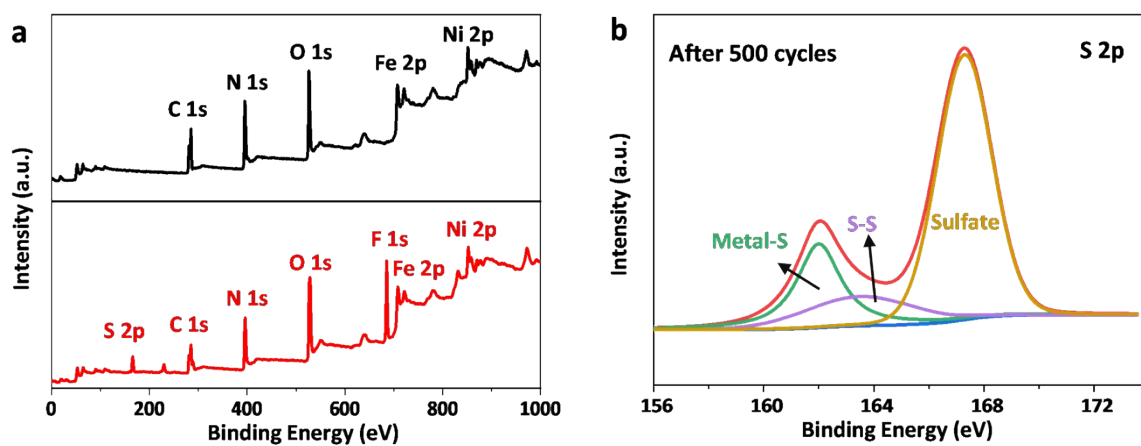

**Fig. S10** (a) XPS survey spectra of NiFe<sub>2</sub>O<sub>4</sub> QDs@g-C<sub>3</sub>N<sub>4</sub>/PP separators before and after 500 cycles. (b) XPS S 2p spectrum of the cycled NiFe<sub>2</sub>O<sub>4</sub> QDs@g-C<sub>3</sub>N<sub>4</sub>/PP separator.
